# Supplementary material
Source: PubMed Central journal article supplement (PMC4787945)

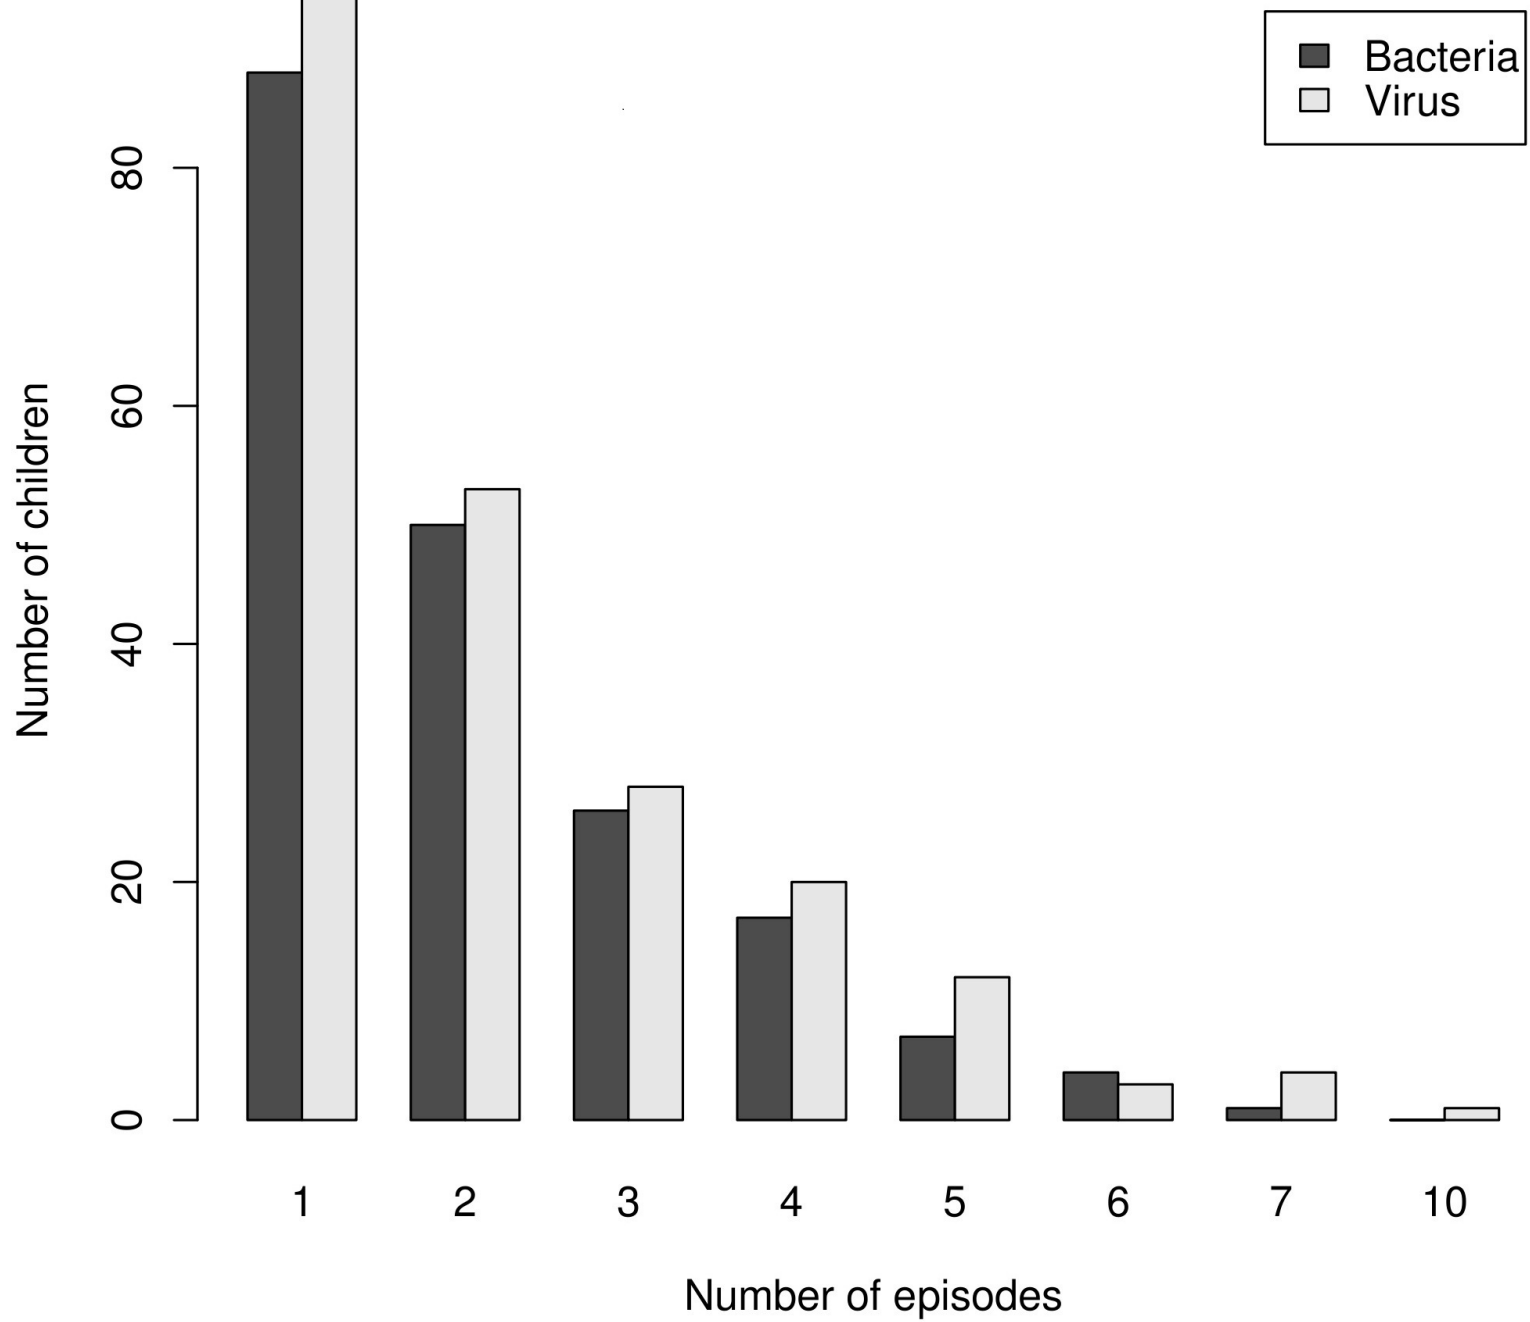

Supplement: bish757864.wf1_default.pdf [file bish757864.wf1_default.pdf]

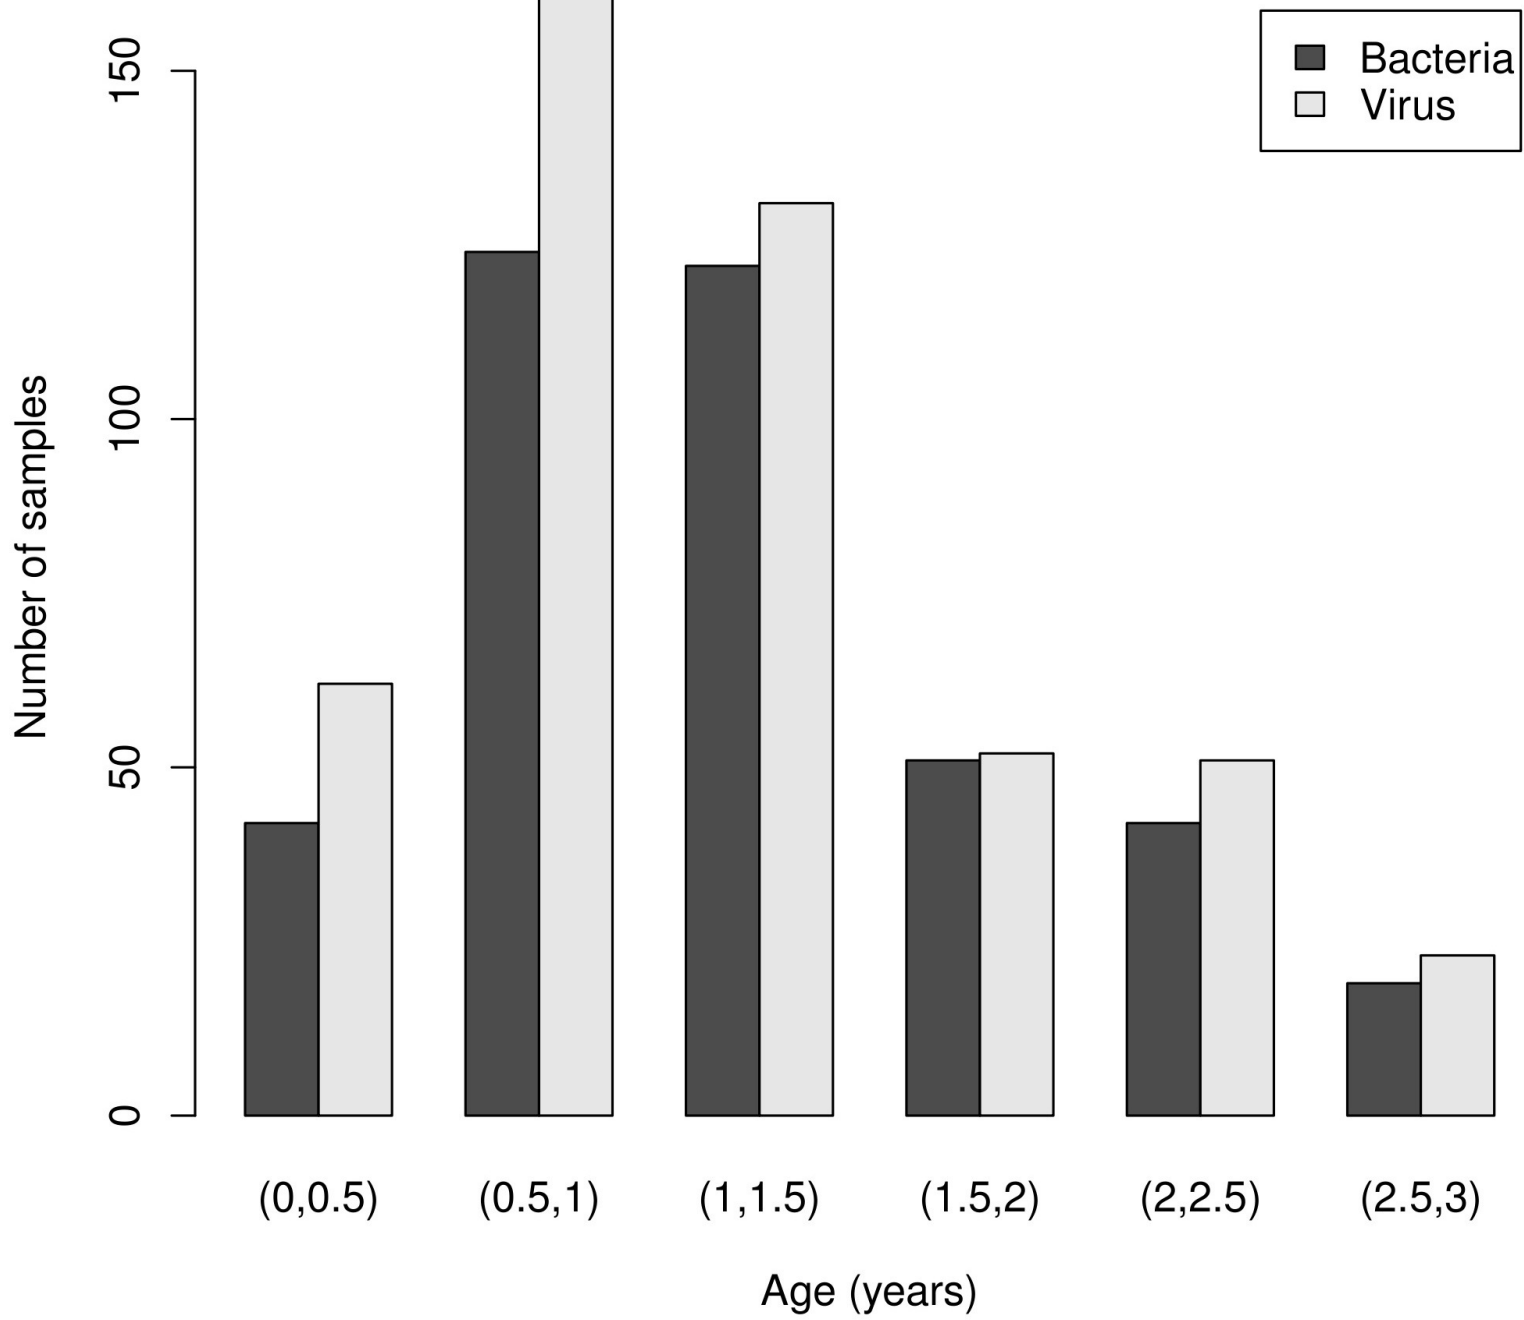

Supplement: bish757864.wf2_default.pdf [file bish757864.wf2_default.pdf]

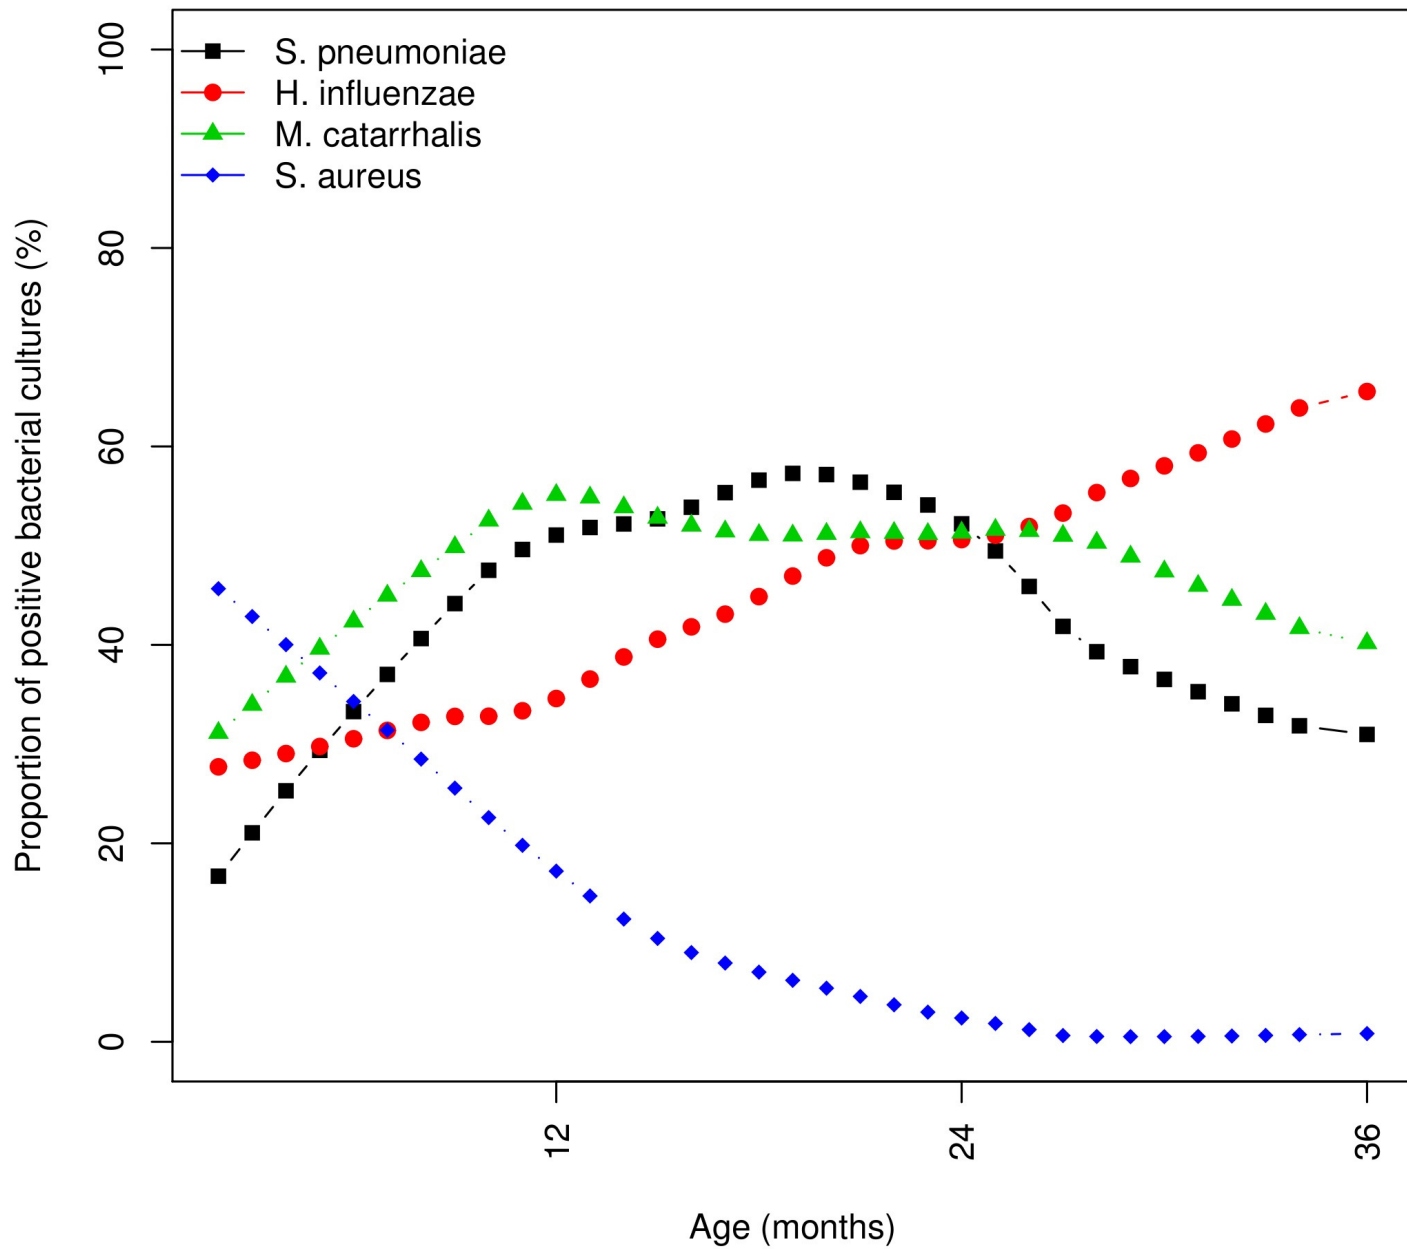

Supplement: bish757864.wf3_default.pdf [file bish757864.wf3_default.pdf]
